# Supplementary material
Source: PubMed Central journal article supplement (PMC2323263)
Supplement: emboj200834s22.pdf [file emboj200834s22.pdf]

## **SUPPLEMENTARY MOVIES**

**Movie 1** EGFP-actin recovery in B16-F1 cell lamellipodium as recorded by epi-illumination upon LSM-mediated photobleaching (see also Figure 1A). Time is as indicated; bar = 3 $\mu$ m.

**Movie 2** Photoactivation of actin within the lamellipodium of B16-F1 cell (corresponds to Figure 1B). Cell coexpressing PA-GFP-actin (green) and mRFP-actin (red). Red rectangle (labelled “2”) marks activation region.

**Movie 3** Rapid translocation of bleached actin to the cell front (corresponds to Figure 1C). B16-F1 cell expressing EGFP-actin was bleached in the lamella (as indicated by red rectangle), which rapidly translocates to the leading edge, and subsequently travels rearwards with the lamellipodium network.

**Movie 4** Mathematical simulation of FRAP experiment shown in Movie 1 (corresponds to Figure 1D).

**Movie 5** Movie illustrating fluorescence intensity measurements of lamellipodial regions (marked by front and back) used for treadmilling analysis. The field marked with “b” was used for measuring background intensity.

**Movie 6** Representative FRAP experiment on two scan-headed confocal microscope of B16-F1 cell expressing EGFP-actin.

**Movie 7** FRAP experiment of B16-F1 cell expressing EGFP-ArpC5B (corresponds to Figure 2A).

**Movie 8** FRAP experiment of B16-F1 cell expressing EGFP-tagged Abi-1 (corresponds to Figure 2E).

**Movie 9** FRAP experiment of B16-F1 cell expressing EGFP-tagged WAVE2, and treated with aluminium fluoride (AlF) (corresponds to Figure 2G).

**Movie 10** FRAP experiment of B16-F1 cell expressing EGFP-VASP (see also Supplementary Figure 3).

**Movie 11** FRAP experiment of B16-F1 cell expressing EGFP-tagged cortactin construct 1 (van Rossum et al., 2003) (corresponds to Figure 3A).

**Movie 12** FRAP experiment of B16-F1 cell expressing cortactin construct 2, cortactin-EGFP-N1 (Kaksonen et al., 2000) (corresponds to Supplementary Figure 4A).

**Movie 13** FRAP experiment of B16-F1 cell expressing EGFP-tagged cortactin 3 (Zhu et al., 2007) (corresponds to Supplementary Figure 4C).

**Movie 14** FRAP experiment of B16-F1 cell expressing EGFP-tagged capping protein beta2 (corresponds to Figure 3C).

**Movie 15** Latrunculin B treatment abolishes capping protein localization at the lamellipodium front. Latrunculin B (LatB, final concentration: 5 $\mu$ M) was added to B16-F1 cell expressing EGFP-tagged CP-beta2 (CP) at the time point indicated (top right, corresponds to Supplementary Figure 6).

**Movie 16** FRAP experiment of B16-F1 cell expressing EGFP-tagged cofilin WT (wild-type) (corresponds to Figure 4A).

**Movie 17** FRAP experiment of B16-F1 cell expressing EGFP-tagged, constitutively active cofilin mutant (S3A).

**Movie 18** FRAP experiment of B16-F1 cell transfected with EGFP-tagged, inactive cofilin mutant (S3D).

**Movie 19** FRAP experiment of MTLn3 rat carcinoma cell expressing EGFP-tagged actin and stimulated with 5nM EGF (corresponds to Figure 5A). Note the exclusive recovery of fluorescent actin from the lamellipodium front.

**Movie 20** FRAP experiment of MTLn3 rat carcinoma cell expressing EGFP-tagged cofilin wild type and stimulated with 5nM EGF (corresponds to Figure 5B). Note rapid cofilin recovery without treadmilling.
